# Supplementary material for: TED—Trazodone Efficacy in Depression: A Naturalistic Study on the Efficacy of Trazodone in an Extended-Release Formulation Compared to SSRIs in Patients with a Depressive Episode—Preliminary Report
Source: MDPI journal article supplement (doi:10.3390/brainsci13010086), 2023-01-02
Supplement: s1 [file s1]

**Figure S1.** Line graphs for each outcome measure with mean values represented on Y-axis and sequential time points on X-axis, with separate lines for each treatment option (SSRI or trazodone). (a) Montgomery-Åsberg Depression Rating Scale (MADRS); (b) Quick Inventory of Depressive Symptomatology - clinician rating (QIDS); (c) Quick Inventory of Depressive Symptomatology – self-rating (QIDS-SR) (d) Hamilton Anxiety Rating Scale (HAM-A); (e) Athens Insomnia Scale (AIS); (f) Sheehan Disability Scale (SDS); (g) Snaith-Hamilton Pleasure Scale (SHAPS). \* =  $p \leq 0.05$ , \*\* =  $p \leq 0.01$ , \*\*\* =  $p \leq 0.001$ .

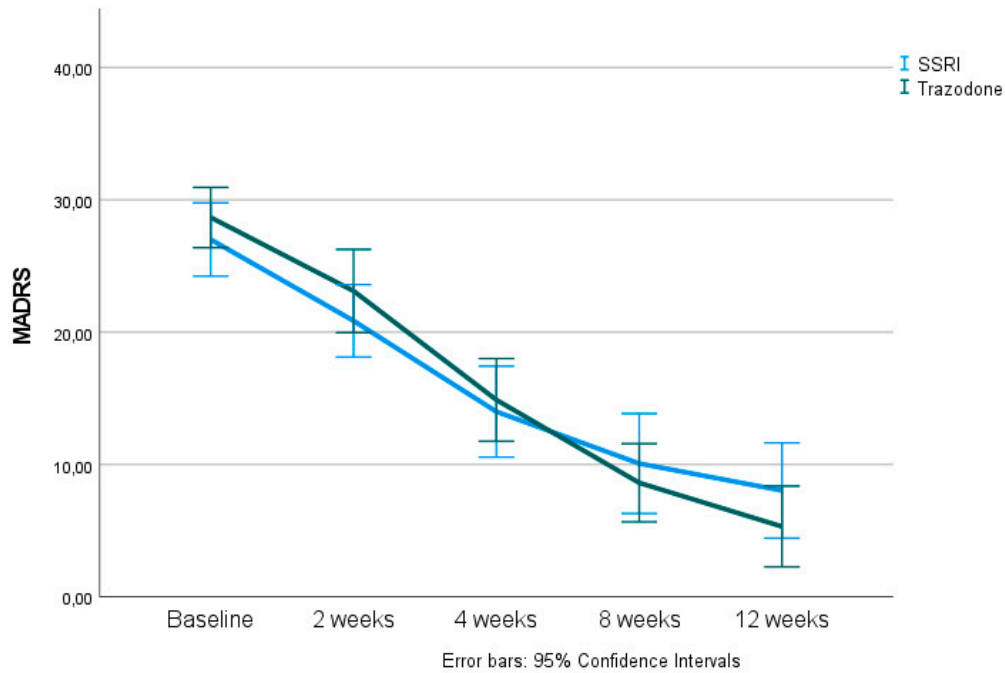

(a)

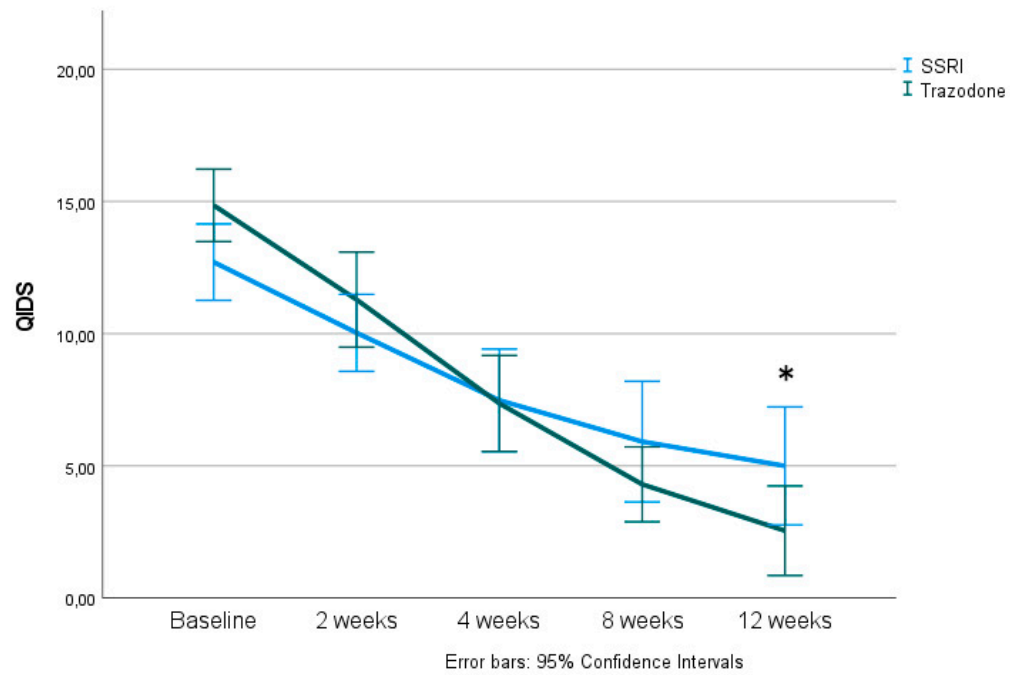

(b)

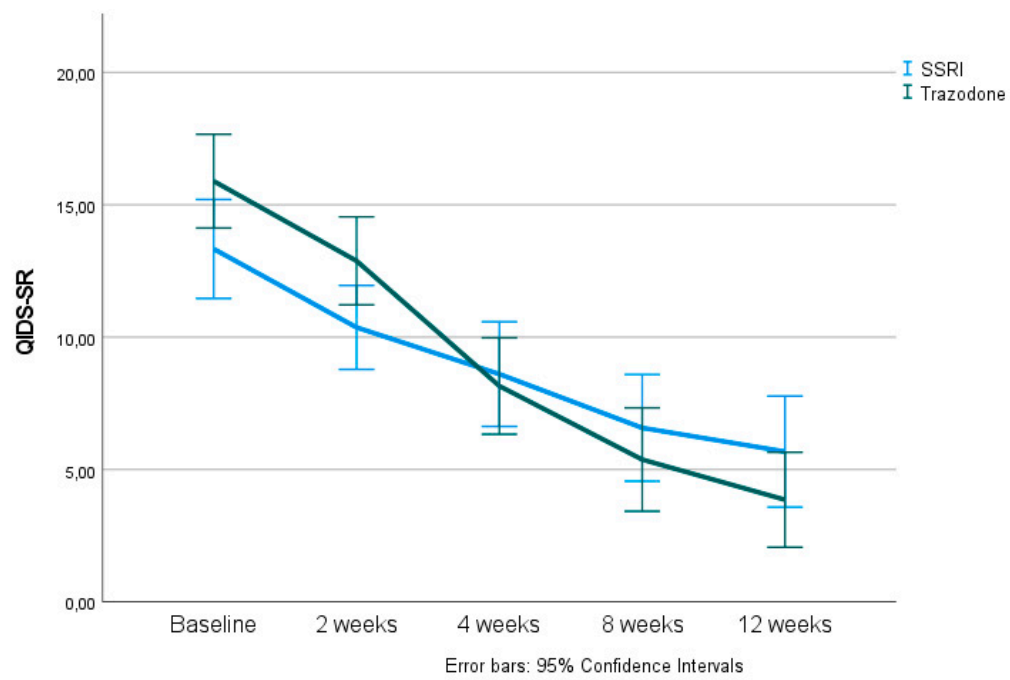

(c)

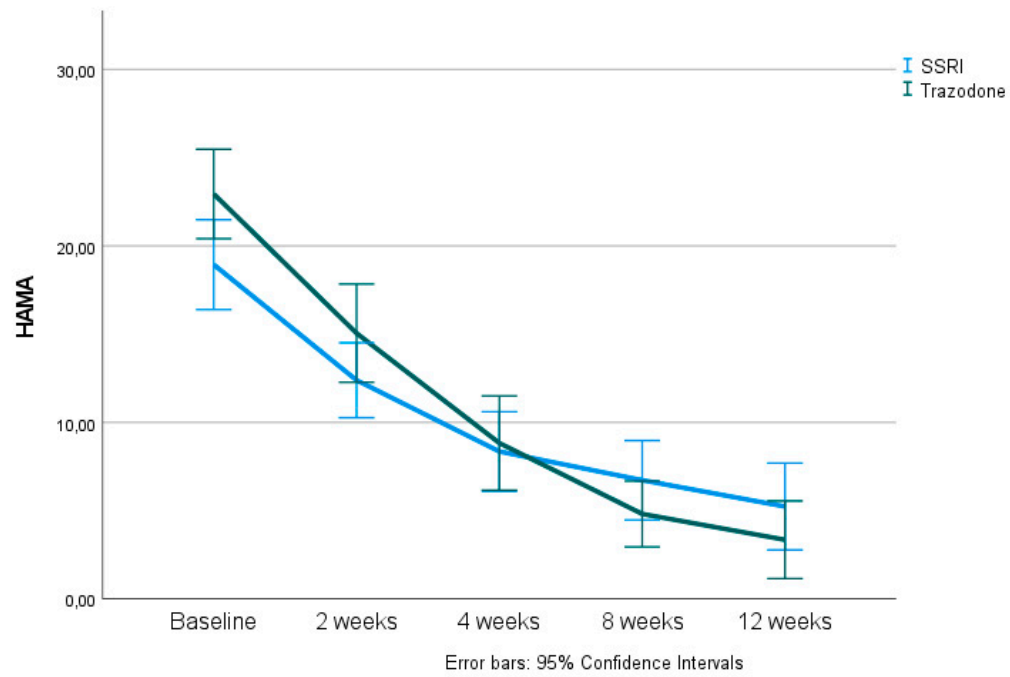

(d)

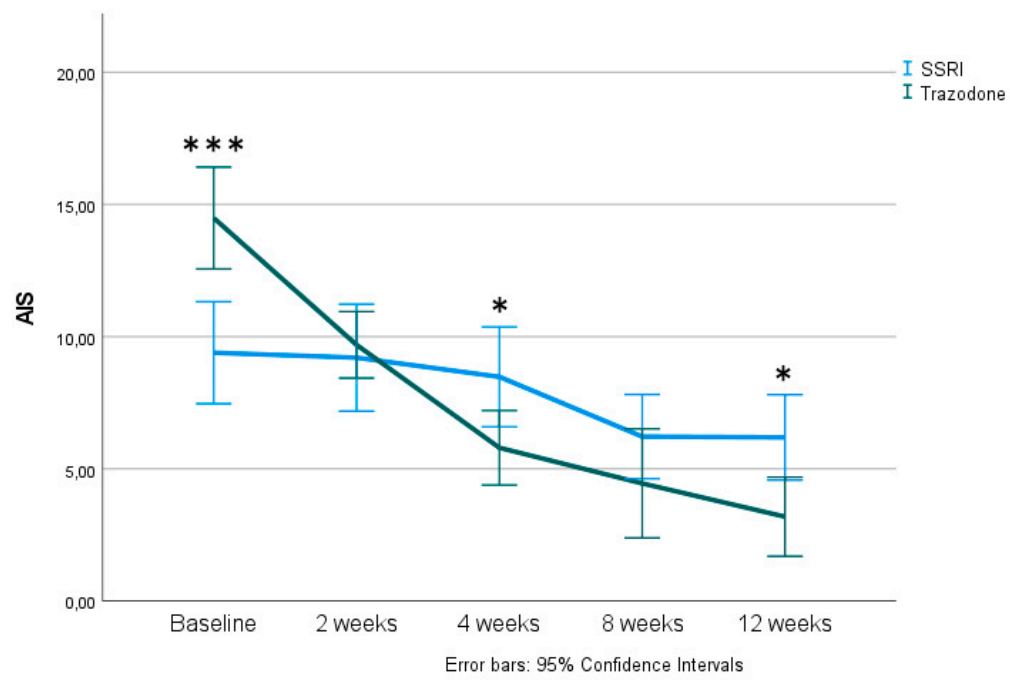

(e)

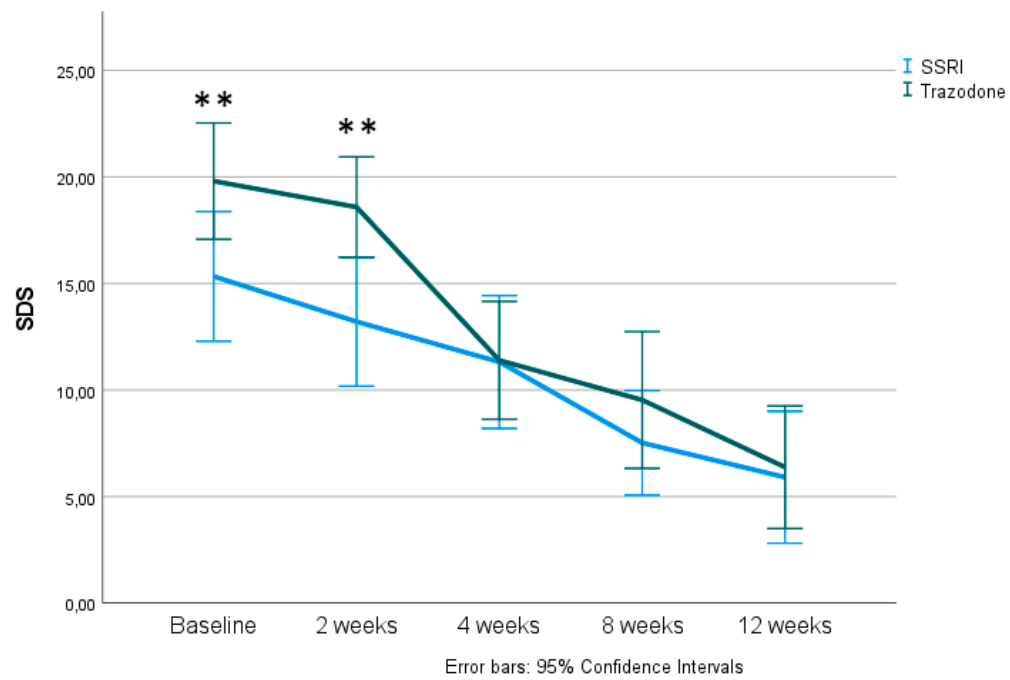

(f)

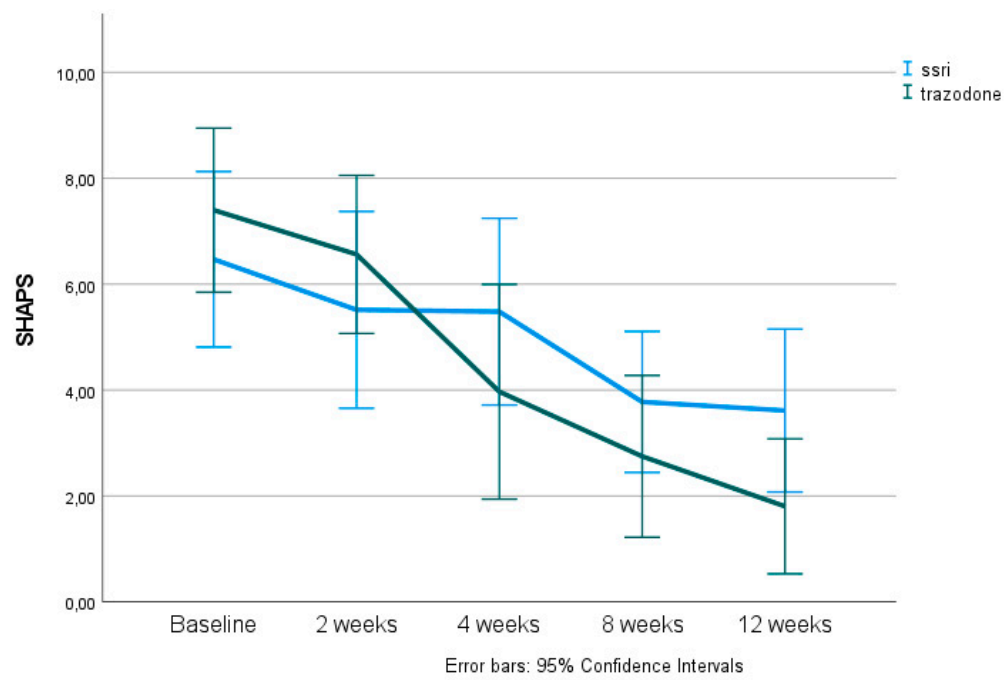

(g)
